# Supplementary material for: Endothelial STING-JAK1 interaction promotes tumor vasculature normalization and antitumor immunity
Source: JCI journal article supplement (doi:10.1172/jci180622), 2025-01-15
Supplement: sd1 [file 1]

# 1 **Supplementary Figures and Figure Legends**

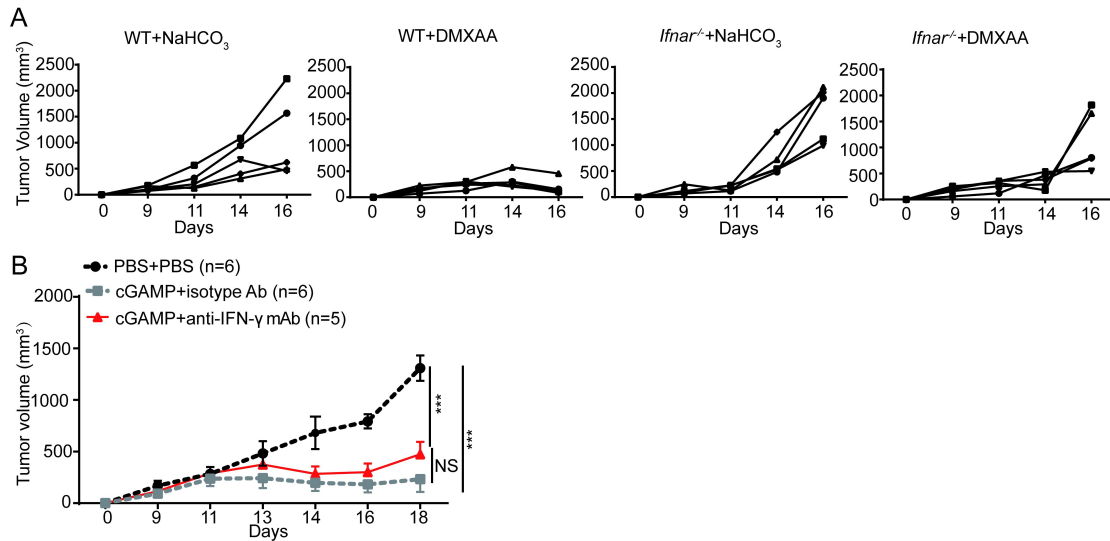

2  
3 **Supplementary Figure 1. STING agonist inhibits tumor growth depending on IFNAR**  
4 **signaling but not IFN- $\gamma$ .** (A) Tumor growth curves for each mouse after intratumoral (i.t.)  
5 injection of DMXAA (200  $\mu$ g/mouse) in WT or *Ifnar*<sup>-/-</sup> mice bearing B16 tumors. (B) C57BL/6  
6 mice bearing B16 tumors were treated when tumor size reached 100 mm<sup>3</sup>, with i.t. injection of  
7 cGAMP (25  $\mu$ g/mouse) on days 10 and 12, and intraperitoneal (i.p.) injection of anti-IFN- $\gamma$  mAb  
8 (100  $\mu$ g/mouse) on days 9, 12, 15. Tumor growth was monitored. The number of mice in each  
9 group was showed in the Figure. Data are represented as mean  $\pm$  SEM. NS, not significant; \*\*\*P <  
10 0.001, by 2-way ANOVA with Sidak's multiple comparisons test (B).  
11

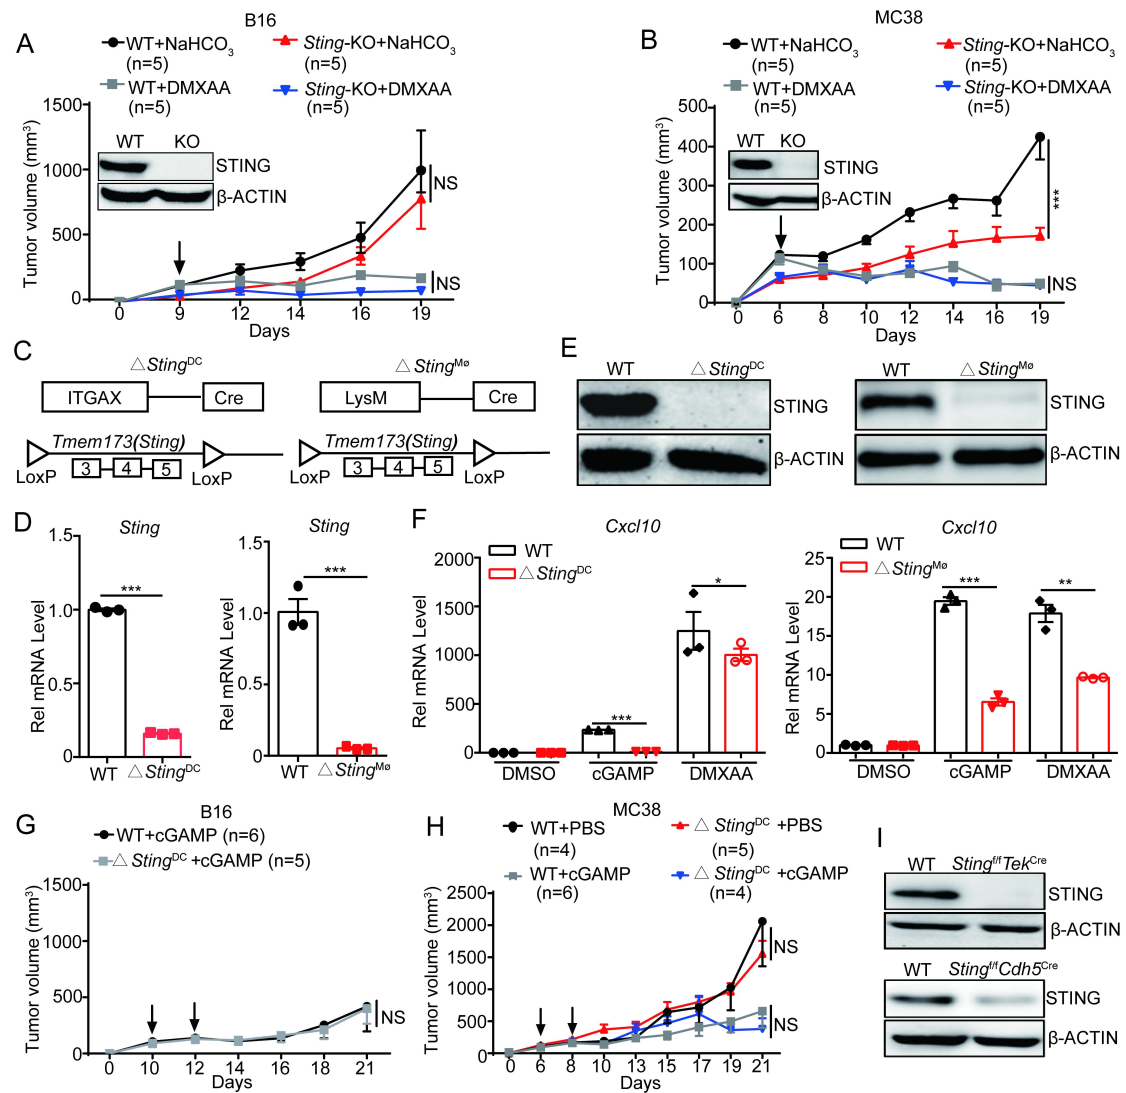

**Supplementary Figure 2. STING expression in endothelial cells is essential for the antitumor effect of STING agonist on MC38 and B16 tumor models.** (A-B) WT mice bearing WT or *Sting*-KO B16 (A) or MC38 (B) tumors were treated with i.t. injection of DMXAA (200 μg/mouse), tumor growth was recorded. NaHCO<sub>3</sub> vehicle treatment was used as control. (C) Schematic diagram showing *Sting*<sup>f/f</sup>/*Itgax*-Cre (Δ*Sting*<sup>DC</sup>) and *Sting*<sup>f/f</sup>/*LysM*-Cre (Δ*Sting*<sup>Mφ</sup>) mice with specific knockout of *Sting* in DCs and Macrophages, respectively. (D-E) STING deficiency was detected by qRT-PCR (D) and Western blot (WB, E) in BMDCs or BMDMs isolated from Δ*Sting*<sup>DC</sup> or Δ*Sting*<sup>Mφ</sup> mice. (F) STING agonists (cGAMP and DMXAA, 5 μg/ml) induced *Cxcl10* expression in BMDCs and BMDMs were detected by qRT-PCR. (G-H) WT or Δ*Sting*<sup>DC</sup> mice bearing B16 (G) or MC38 (H) tumors were treated with i.t. injection of cGAMP (25 μg/mouse), tumor growth was recorded. PBS vehicle treatment was used as control. (I) STING deficiency in endothelium was detected by WB in *Sting*<sup>f/f</sup>/*Tek*-Cre and *Sting*<sup>f/f</sup>/*Cdh5*-Cre mice. The number of mice in each group was showed in the Figure. Data are represented as mean ± SEM. NS, not significant; \*P < 0.05; \*\*P < 0.01; \*\*\*P < 0.001, by two-tailed unpaired t-test (D, F), and tumor growth curves were analyzed by 2-way ANOVA with Sidak's multiple comparisons test (A, B, G and H).

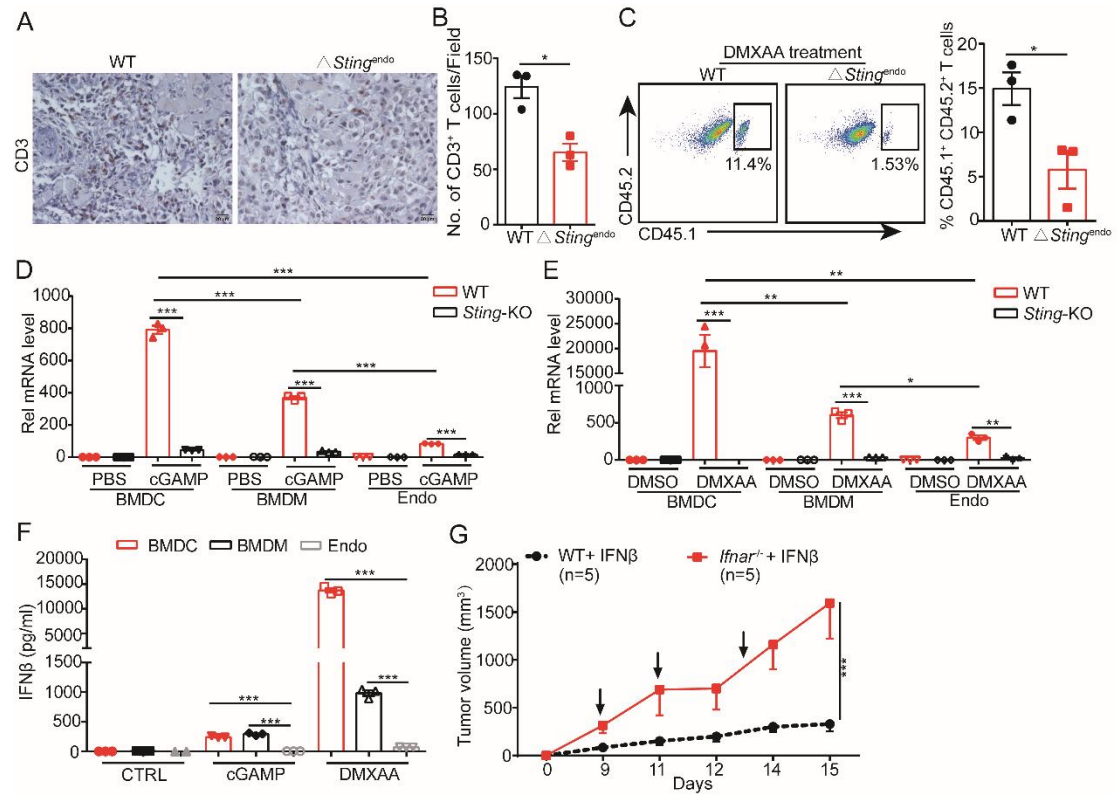

**Supplementary Figure 3. Deficiency of STING in endothelial cells impairs tumor infiltration of CD8<sup>+</sup> T cells and tumor blood vessel normalization induced by STING agonist.** (A-B) Representative images and quantified results showing intratumoral CD3<sup>+</sup> T cells infiltration detected by immunohistochemical staining after i.t. treatment of DMXAA (200  $\mu$ g/mouse) on B16 tumor-bearing WT or *Sting*<sup>fl/fl</sup>/*Cdh5-Cre* mice. (C) CD45.1<sup>+</sup> CD45.2<sup>+</sup> CD8<sup>+</sup> T cells were injected into B16 tumor-bearing CD45.2<sup>+</sup> C57BL/6 mice (WT or *Sting*<sup>fl/fl</sup>/*Tek-Cre*) via the tail vein and DMXAA (200  $\mu$ g/mouse) was injected by intratumoral injection; 3 days later, CD45.1<sup>+</sup> CD45.2<sup>+</sup> CD8<sup>+</sup> T cell infiltrations in the tumors were detected by FACS. (D-E) qPCR detection of *Ifn $\beta$*  expression in DCs, macrophages and endothelial cells after treatment with cGAMP (5  $\mu$ g/ml, D) or DMXAA (5  $\mu$ g/ml, E) for 3 hours. (F) ELISA detection of supernatant IFN $\beta$  levels in BMDCs, BMDMs and endothelial cells after treatment with STING agonists (cGAMP and DMXAA, 5  $\mu$ g/ml) for 24 hours. (G) B16 tumor-bearing WT or *Ifnar*-KO mice received i.t. injection of IFN $\beta$  (50 ng/mouse) at the indicated time (arrows), then the tumor size was recorded. Data are represented as mean  $\pm$  SEM. \*P < 0.05; \*\*P < 0.01; \*\*\*P < 0.001, by two-tailed unpaired t-test (B, C), or by one-way ANOVA with Sidak's multiple comparisons test (D-F) and tumor growth curves were used 2-way ANOVA with Sidak's multiple comparisons test (G).

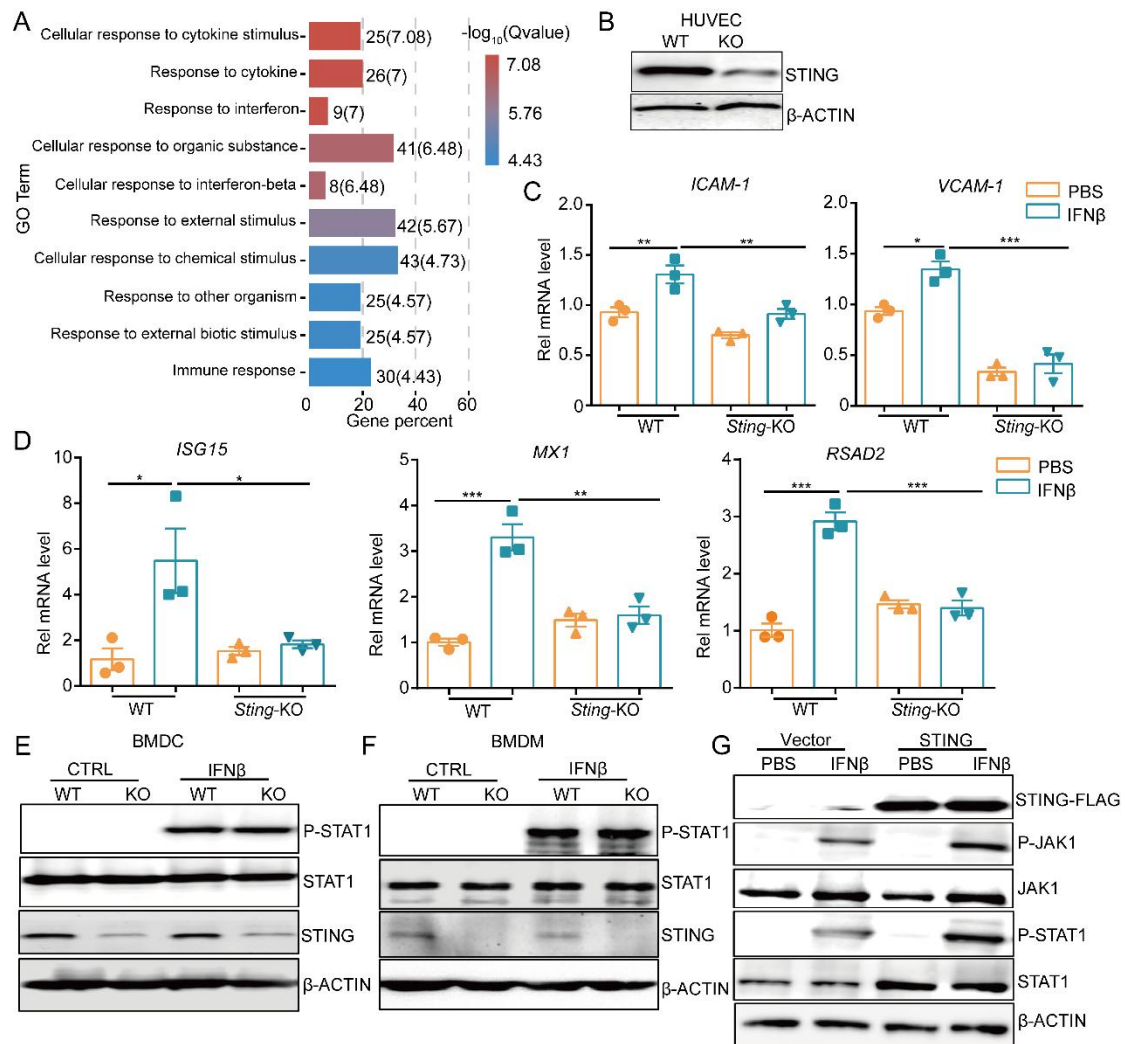

**Supplementary Figure 4. STING expression in endothelial cells is required for IFNAR downstream signaling activation.** (A) Gene ontology (GO) enrichment analysis showed significant enrichment for the response to interferon and immune response after IFNβ (10 ng/ml) stimulation for 3 hours. (B) STING protein expression levels were detected by WB in HUVEC cells. (C-D) qRT-PCR detection of the mRNA expression levels of *ICAM-1*, *VCAM-1*, *ISG15*, *MX1* and *RSAD2* in WT and *Sting*-KO HUVEC cells after IFNβ (10 ng/ml) stimulation for 3 hours. (E-F) WB analysis of STAT1 phosphorylation levels in BMDCs (WT, *Sting*-KO) and BMDMs (WT, *Sting*-KO) after treatment with PBS or IFNβ (10 ng/ml) for 15 minutes. (G) Primary mouse endothelial cells were infected with lentivirus expressing WT STING, then treated with IFNβ (10 ng/ml) for 15 minutes, then WCL were harvested for WB analysis of phosphorylated and total JAK1, STAT1 levels (P-JAK1, JAK1, P-STAT1, STAT1). Data are represented as mean ± SEM. \*P < 0.05; \*\*P < 0.01; \*\*\*P < 0.001, by one-way ANOVA with Sidak's multiple comparisons test (C-D).

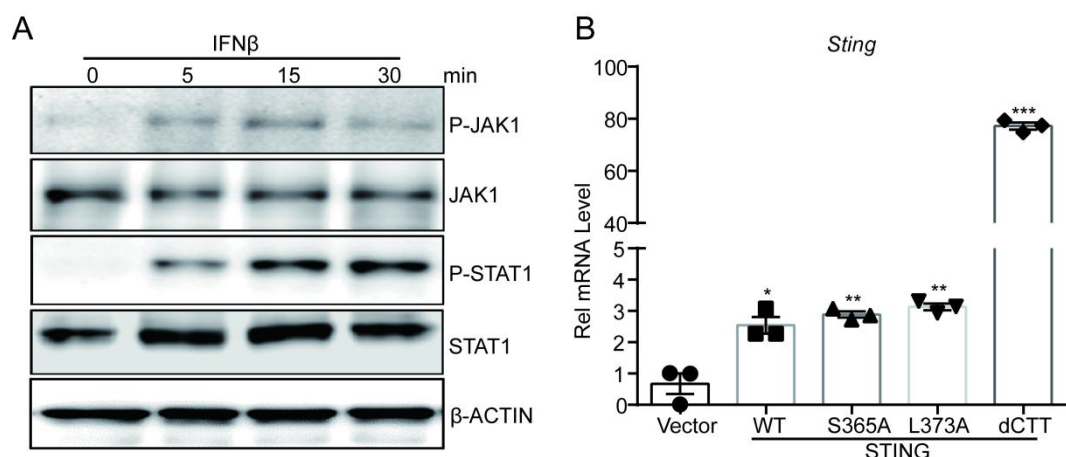

**Supplementary Figure 5. STING interacts with JAK1 in primary mouse endothelial cells upon IFNβ stimulation.** (A) Phosphorylation levels of JAK1 and STAT1 in primary mouse endothelial cells after IFNβ (10 ng/ml) stimulation at the indicated time (0, 5, 15, 30 minutes) were detected by WB. (B) qPCR analysis of the mRNA levels of STING in expression primary mouse endothelial cells after overexpression of WT or mutant STING. WT: WT-STING, S365A: serine 365-to-alanine, L373A: leucine 373-to-alanine, dCTT: deficiency of CTT domain. Data are represented as mean ± SEM. \*P < 0.05; \*\*P < 0.01; \*\*\*P < 0.001, by two-tailed unpaired t-test (B).

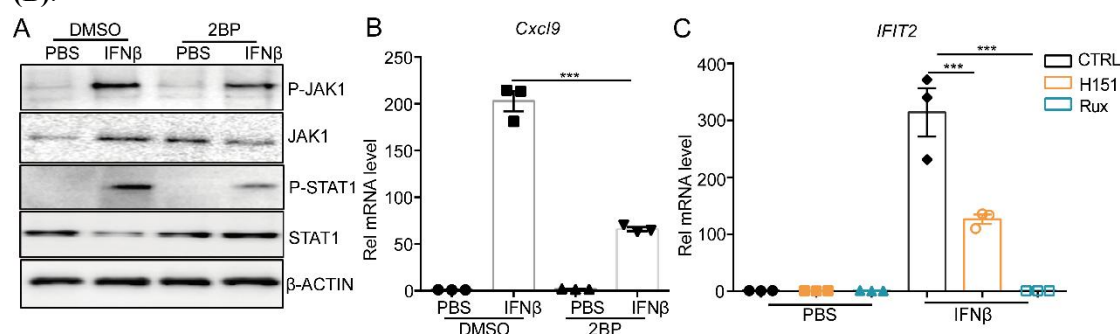

**Supplementary Figure 6. STING C91A mutation disrupts its interaction with JAK1 and impairs JAK1 activation upon IFNβ stimulation.** (A) WB analysis of phosphorylation level of JAK1 and STAT1 in mouse endothelial cells stimulated with IFNβ (10 ng/ml) for 15 minutes, with or without pre-treatment with 2-Bromopalmitate (2-BP, 10 μM). (B) qPCR analysis of the expression of *Cxcl9* in mouse endothelial cells stimulated with IFNβ (10 ng/ml) for 3 hours, with or without pre-treatment with 2-BP (10 μM). (C) qPCR analysis of the expression of *IFIT2* in HUVEC cells stimulated with IFNβ (10 ng/ml) for 3 hours, with pre-treatment of H151 (10 μg/ml) or Ruxolitinib (Rux, 5 μM) for 30 minutes. Data are represented as mean ± SEM. \*\*\*P < 0.001, by one-way ANOVA with Sidak's multiple comparisons test (B-C).

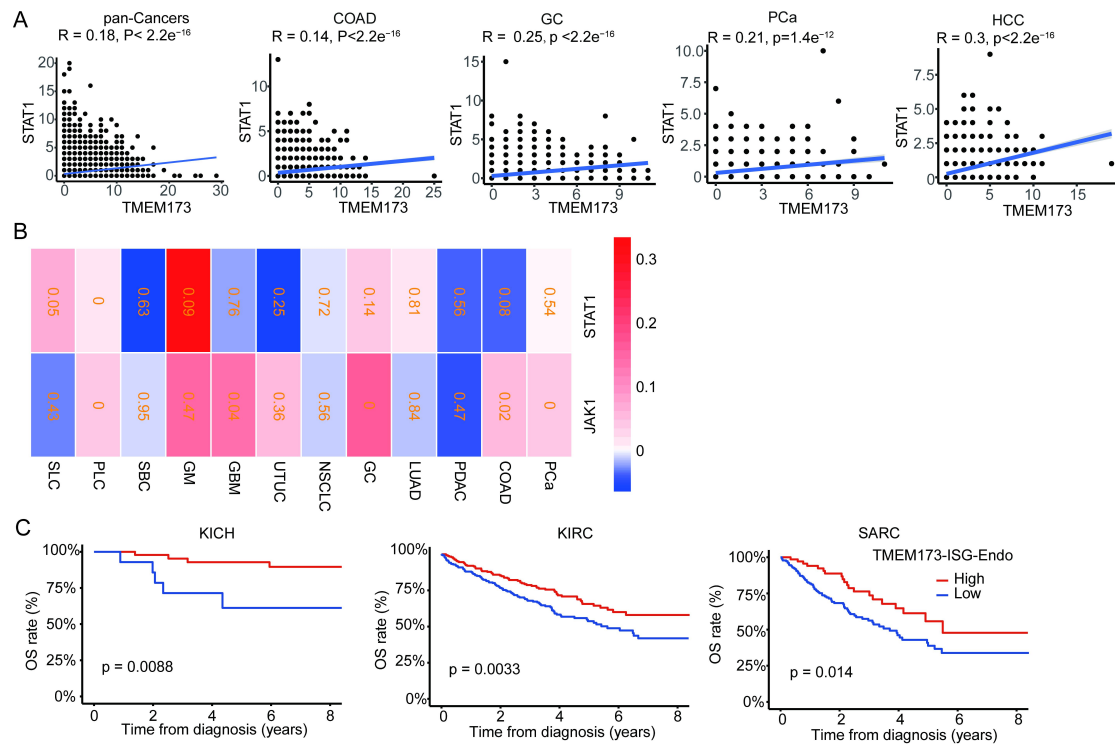

**Supplementary Figure 7. Endothelial STING expression positively correlates with endothelial JAK1-STAT1 signaling and antitumor immunity.** (A) Correlation between endothelial STING expression and endothelial STAT1 expression in pan-Cancers and COAD, GC, PCa and HCC cancers. (B) Correlation between endothelial STING expression and endothelial JAK1, STAT1 expression analyzed from single-cell database. (C) Kaplan-Meier survival curves of KICH, KIRC and SARC patients stratified by endothelial STING-ISR expression levels. COAD: colon adenocarcinoma; GC: gastric carcinoma; PCa: prostate cancer; HCC: hepatocellular carcinoma; SLC: secondary liver cancer; PLC: primary liver cancer; SBC: skull base chordoma; GM: glioblastoma; GBM: glioblastoma multiforme; UTUC: upper tract urothelial carcinoma; NSCLC: non-small cell lung cancer; LUAD: lung adenocarcinoma; PDAC: pancreatic ductal adenocarcinoma; KICH: kidney chromophobe; KIRC: kidney renal clear cell carcinoma; SARC: soft tissue sarcoma. R and P values by Pearson's correlation test (A-B), P values by the log-rank test (C).
